# Supplementary material for: Inferring the location and scale of mixing between habitat areas of lesser sandeel through information from the fishery
Source: Oxford University Press journal article supplement (doi:10.1093/icesjms/fsq154), 2010-10-30
Supplement: fsq154supp.pdf [file fsq154supp.pdf]

## **Supplementary material**

### **Deriving the map of sandeel habitats (S1)**

From the data collected (Figure S1), the final map of the sandeel fishing grounds was produced using the five-step procedure below.

- (i) A point shapefile with the data was created from a textfile using ArcMap (ESRI ArcGIS);
- (ii) A kernel density analysis (Silverman, 1986) was applied to the shapefile using a quadratic kernel function to fit a smoothly tapered surface to each point (search radius, 0.015 decimal degrees; output cell size, 0.006 decimal degrees), to produce a grid using the Spatial Analyst extension with ArcGIS;
- (iii) From this grid, a new grid including only cells with a density of points  $>50\ 000$  was produced, subsequently converted to a shapefile so that each fishing ground is defined as a polygon;
- (iv) The polygons were adjusted manually considering raw data along with information on individual grounds, location of fishing tracks, and topography, the greatest weight being given to the information in the raw data;
- (v) Fishers from different ports evaluated the map of fishing grounds, after which it was modified according to their guidelines, resulting in the inclusion of additional grounds (from additional navigation data) and deletion of non-sandeel grounds. The map was subjected to several such evaluations before the final map was produced (Figure S2).

Table S1 presents the results of the comparison of length distributions between fishing grounds.

### **References**

Silverman, B. W. 1986. Density Estimation for Statistics and Data Analysis. Chapman and Hall, New York. 175 pp.

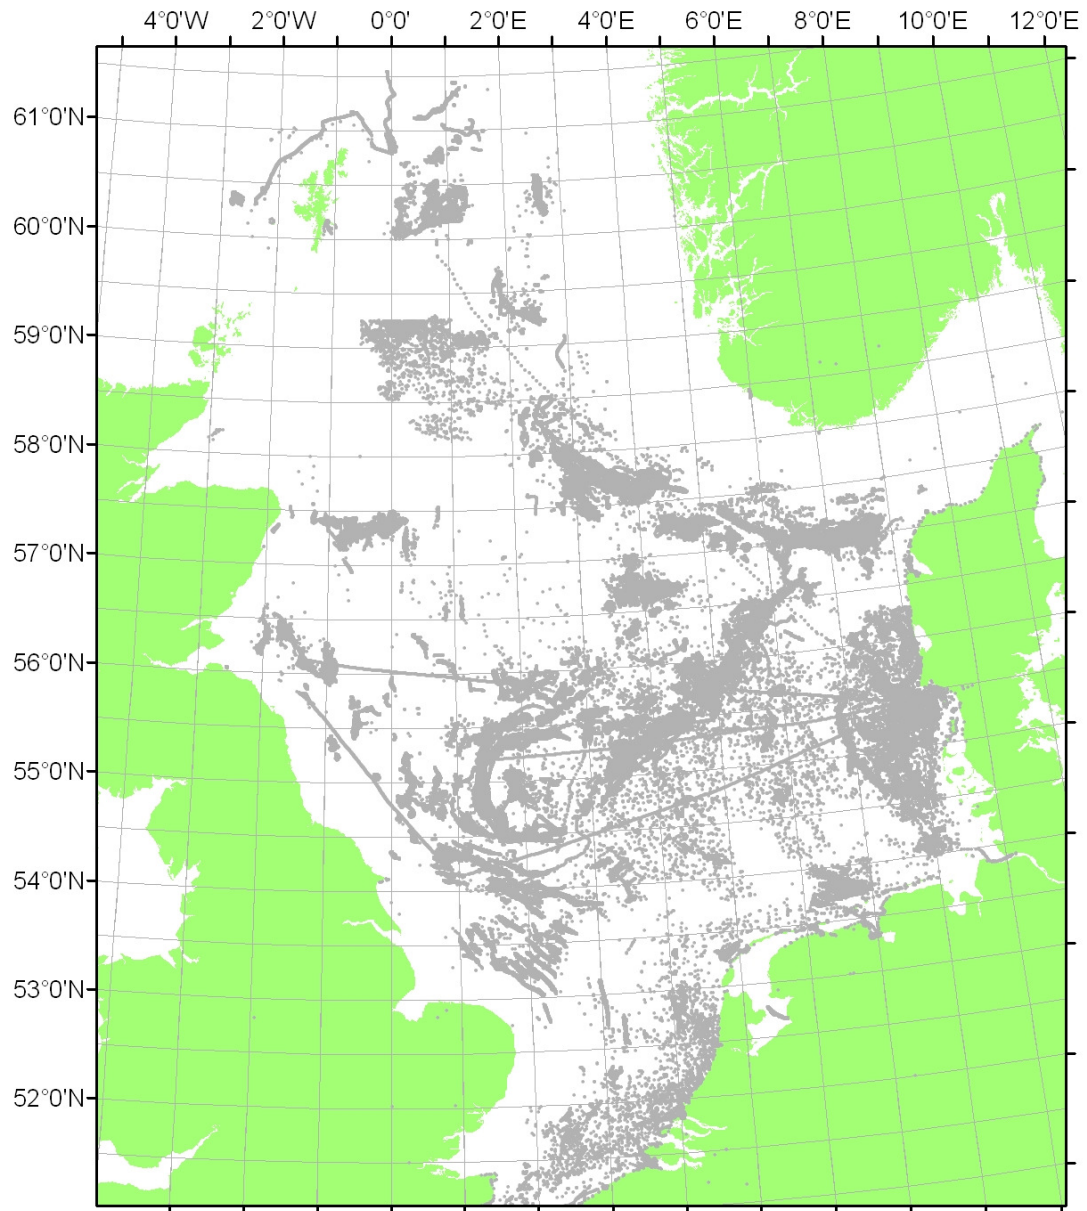

**Figure S1.** Map of raw data from various GPS-based navigation systems.

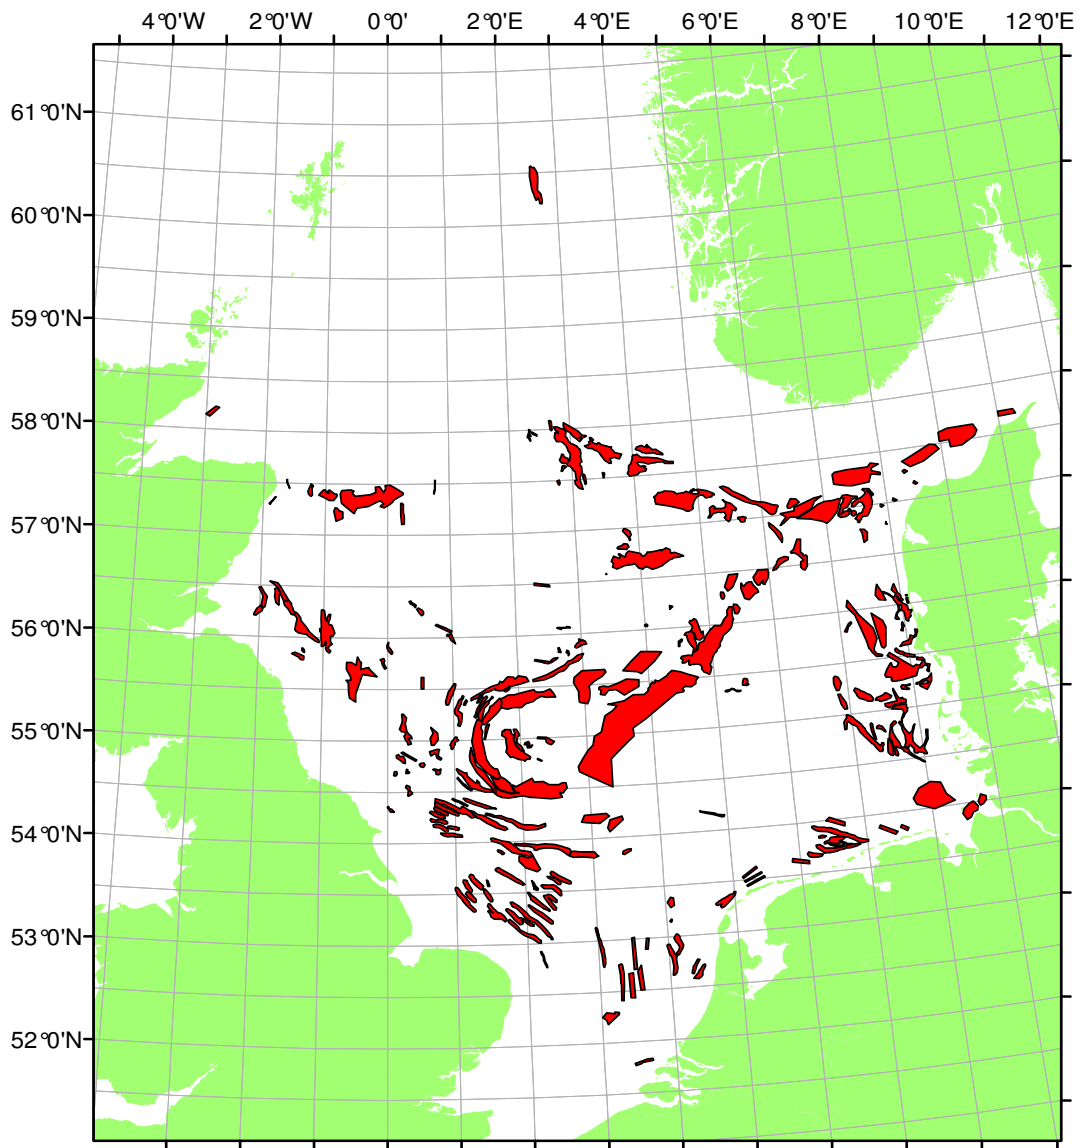

**Figure S2.** Sandeel habitat areas.

**Table S1.** Results of the comparison of length distributions between fishing grounds.

| Ground 1      | Ground 2               | Distance-group | Total area |      | Ground-specific |      | <i>F</i> | <i>p(F)</i> |
|---------------|------------------------|----------------|------------|------|-----------------|------|----------|-------------|
|               |                        |                | Deviance   | d.f. | Deviance        | d.f. |          |             |
| N.W. Rough    | Stendysse/Lissis Revle | 0              | 416        | 159  | 52              | 5    | 4.11     | 0.0012      |
| N.W. Rough    | Stendysse/Lissis Revle | 10             | 433        | 174  | 53              | 5    | 4.35     | 0.0007      |
| N.W. Rough    | Stendysse/Lissis Revle | 10             | 1 150      | 179  | 249             | 6    | 6.67     | <0.0001     |
| N.W. Rough    | Southernmost Rough     | 20             | 430        | 153  | 43              | 6    | 2.64     | 0.0159      |
| N.W. Rough    | Southernmost Rough     | 20             | 995        | 239  | 84              | 6    | 3.45     | 0.0022      |
| N.W. Rough    | Southernmost Rough     | 20             | 1 112      | 196  | 81              | 6    | 2.45     | 0.0234      |
| N.W. Rough    | Stendysse/Lissis Revle | 20             | 474        | 160  | 120             | 5    | 8.39     | <0.0001     |
| N.W. Rough    | Stendysse/Lissis Revle | 20             | 892        | 228  | 36              | 6    | 1.57     | 0.1524      |
| Rute 18       | N.W. Rough             | 20             | 278        | 129  | 42              | 5    | 4.08     | 0.0014      |
| Scooter Plads | Wee Bankie - S.W.      | 20             | 1 243      | 382  | 284             | 6    | 14.79    | <0.0001     |
| N.W. Rough    | Southernmost Rough     | 30             | 482        | 168  | 56              | 6    | 3.36     | 0.0030      |
| N.W. Rough    | Southernmost Rough     | 30             | 1 291      | 259  | 63              | 6    | 2.15     | 0.0455      |
| N.W. Rough    | Southernmost Rough     | 30             | 640        | 186  | 36              | 7    | 1.56     | 0.1430      |
| N.W. Rough    | Stendysse/Lissis Revle | 30             | 736        | 178  | 48              | 6    | 2.01     | 0.0614      |
| Rute 18       | N.W. Rough             | 30             | 522        | 179  | 74              | 5    | 5.25     | 0.0001      |
| Sorel         | N.W. Rough             | 30             | 1 723      | 255  | 1 141           | 6    | 28.81    | <0.0001     |
| Sorel         | N.W. Rough             | 30             | 791        | 164  | 30              | 5    | 1.29     | 0.2664      |
| Sorel         | Stenkanten vs. Sorel   | 30             | 513        | 204  | 118             | 6    | 8.06     | <0.0001     |
| Middle Rough  | Sorel                  | 40             | 679        | 177  | 101             | 5    | 5.40     | 0.0001      |
| N.W. Rough    | Southernmost Rough     | 40             | 557        | 157  | 148             | 6    | 7.20     | <0.0001     |
| N.W. Rough    | Southernmost Rough     | 40             | 425        | 153  | 47              | 6    | 2.91     | 0.0086      |
| N.W. Rough    | Southernmost Rough     | 40             | 1 447      | 270  | 534             | 6    | 16.96    | <0.0001     |
| N.W. Rough    | Southernmost Rough     | 40             | 1 937      | 388  | 64              | 6    | 2.17     | 0.0432      |
| N.W. Rough    | Southernmost Rough     | 40             | 1 313      | 324  | 272             | 7    | 9.81     | <0.0001     |
| Rute 18       | Stendysse/Lissis Revle | 40             | 617        | 159  | 157             | 5    | 8.36     | <0.0001     |
| Sorel         | Lisborgs Revle         | 40             | 663        | 209  | 185             | 6    | 9.99     | <0.0001     |
| Sorel         | N.W. Rough             | 40             | 2 098      | 313  | 1 344           | 6    | 34.07    | <0.0001     |
| Sorel         | N.W. Rough             | 40             | 849        | 197  | 191             | 6    | 7.62     | <0.0001     |
| Sorel         | N.W. Rough             | 40             | 985        | 248  | 47              | 5    | 2.40     | 0.0356      |
| Sorel         | Stenkanten vs. Sorel   | 40             | 554        | 218  | 135             | 6    | 9.08     | <0.0001     |
| Middle Rough  | Sorel                  | 50             | 1 148      | 300  | 234             | 5    | 12.42    | <0.0001     |
| N.W. Rough    | S.W. Spit              | 50             | 434        | 140  | 63              | 6    | 3.56     | 0.0019      |
| N.W. Rough    | Southernmost Rough     | 50             | 580        | 158  | 143             | 6    | 6.74     | <0.0001     |
| N.W. Rough    | Southernmost Rough     | 50             | 425        | 138  | 34              | 6    | 1.94     | 0.0736      |
| N.W. Rough    | Southernmost Rough     | 50             | 1 591      | 285  | 424             | 6    | 12.93    | <0.0001     |
| N.W. Rough    | Southernmost Rough     | 50             | 1 762      | 341  | 72              | 6    | 2.36     | 0.0284      |
| N.W. Rough    | Southernmost Rough     | 50             | 2 090      | 394  | 575             | 6    | 18.35    | <0.0001     |
| N.W. Rough    | Southernmost Rough     | 50             | 1 374      | 236  | 280             | 6    | 8.21     | <0.0001     |
| Rute 18       | Southernmost Rough     | 50             | 618        | 168  | 97              | 5    | 5.45     | 0.0001      |
| Sorel         | Lisborgs Revle         | 50             | 663        | 209  | 185             | 6    | 9.99     | <0.0001     |

|              |                      |    |       |     |       |   |       |         |
|--------------|----------------------|----|-------|-----|-------|---|-------|---------|
| Sorel        | N.W. Rough           | 50 | 2 873 | 441 | 1 652 | 6 | 42.85 | <0.0001 |
| Sorel        | N.W. Rough           | 50 | 813   | 197 | 138   | 6 | 5.73  | <0.0001 |
| Sorel        | N.W. Rough           | 50 | 820   | 192 | 32    | 5 | 1.53  | 0.1788  |
| Sorel        | Stenkanten vs. Sorel | 50 | 382   | 154 | 71    | 6 | 4.94  | 0.0001  |
| Middle Rough | Sorel                | 60 | 1 110 | 299 | 231   | 5 | 12.64 | <0.0001 |
| N.W. Rough   | Southernmost Rough   | 60 | 468   | 130 | 118   | 6 | 5.71  | <0.0001 |
| N.W. Rough   | Southernmost Rough   | 60 | 1 447 | 270 | 534   | 6 | 16.96 | <0.0001 |
| N.W. Rough   | Southernmost Rough   | 60 | 1 584 | 291 | 110   | 6 | 3.44  | 0.0022  |
| N.W. Rough   | Southernmost Rough   | 60 | 1 996 | 380 | 664   | 6 | 21.39 | <0.0001 |
| N.W. Rough   | Southernmost Rough   | 60 | 1 374 | 236 | 280   | 6 | 8.21  | <0.0001 |
| Rute 18      | Southernmost Rough   | 60 | 618   | 168 | 97    | 5 | 5.45  | 0.0001  |
| Sorel        | Lisborgs Revle       | 60 | 527   | 153 | 131   | 5 | 7.85  | <0.0001 |
| Sorel        | N.W. Rough           | 60 | 2 819 | 441 | 1 619 | 6 | 42.78 | <0.0001 |
| Sorel        | N.W. Rough           | 60 | 948   | 232 | 222   | 6 | 9.29  | <0.0001 |
| Sorel        | N.W. Rough           | 60 | 1 181 | 293 | 91    | 5 | 4.61  | 0.0004  |
| Middle Rough | Sorel                | 70 | 872   | 230 | 273   | 5 | 14.71 | <0.0001 |
| N.W. Rough   | Southernmost Rough   | 70 | 943   | 139 | 493   | 5 | 15.05 | <0.0001 |
| N.W. Rough   | Southernmost Rough   | 70 | 986   | 188 | 157   | 6 | 5.15  | <0.0001 |
| Sorel        | N.W. Rough           | 70 | 2 975 | 469 | 1 720 | 6 | 45.76 | <0.0001 |
| Sorel        | N.W. Rough           | 70 | 990   | 244 | 252   | 6 | 10.60 | <0.0001 |
| Sorel        | N.W. Rough           | 70 | 1 181 | 293 | 91    | 5 | 4.61  | 0.0004  |

Total area deviance and d.f. indicate the deviance from a common length distribution and the degrees of freedom of this common length distribution. Ground-specific deviance and d.f. indicate the reduction in deviance obtained by modelling the length distribution in each area separately, and the associated loss of degrees of freedom. Distance-groups are 10-km groups denoted by the least distance in the group (e.g. 0 equals the group 0–10 km).
